# Supplementary material for: Upregulated expression of ubiquitin ligase TRIM21 promotes PKM2 nuclear translocation and astrocyte activation in experimental autoimmune encephalomyelitis
Source: eLife journal article supplement (doi:10.7554/elife.98181), 2024-06-14

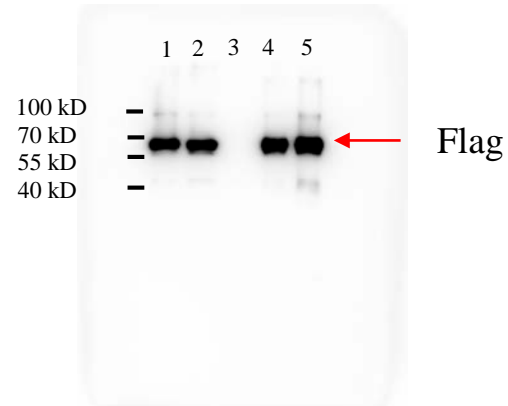

1: input Myc-vector+Flag-PKM2

2: input Myc-TRIM21+Flag-PKM2

4: IP-Flag Myc-vector+Flag-PKM2

5: IP-Flag Myc-TRIM21+Flag-PKM2

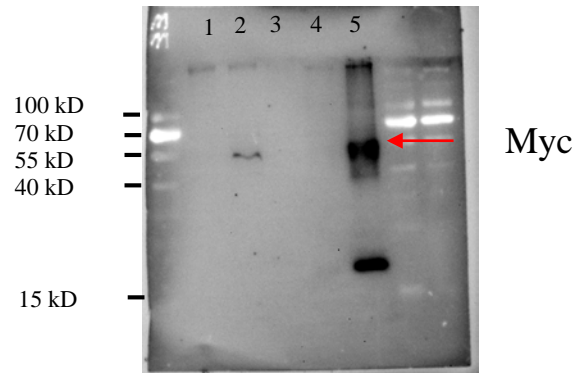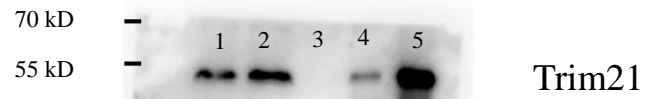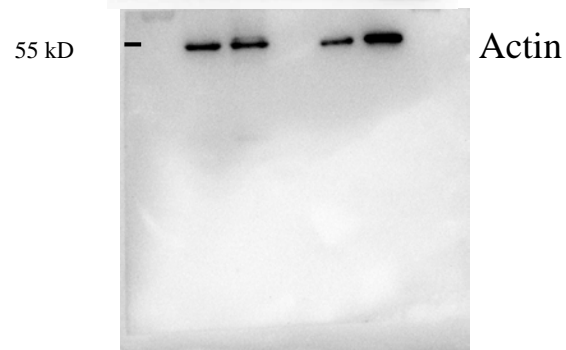

Supplement: fig4-data3 [file elife-98181-fig4-data3-v1.pdf]
