# Supplementary material for: Upregulated expression of ubiquitin ligase TRIM21 promotes PKM2 nuclear translocation and astrocyte activation in experimental autoimmune encephalomyelitis
Source: eLife journal article supplement (doi:10.7554/elife.98181), 2024-06-14

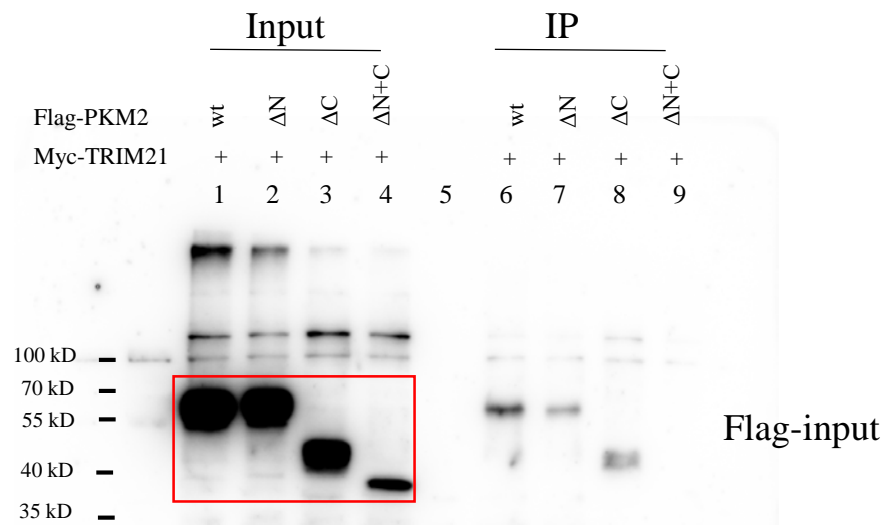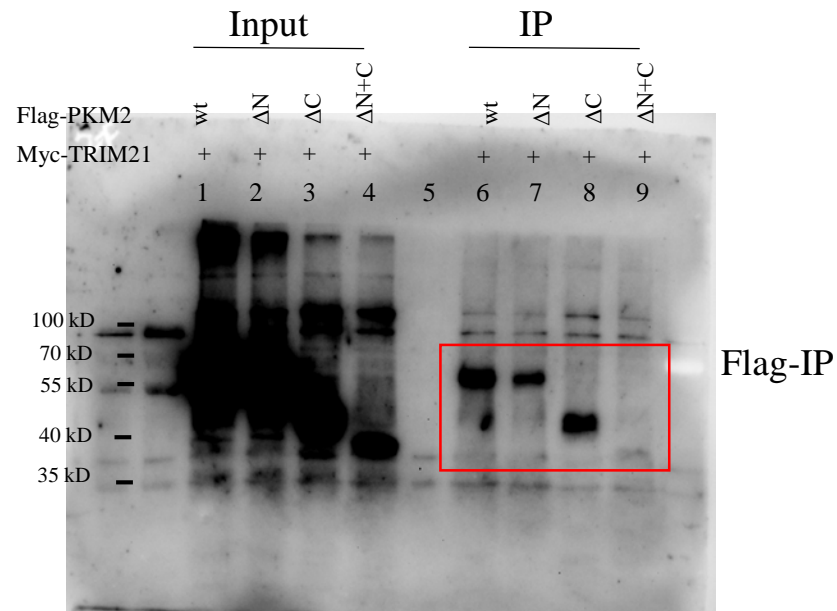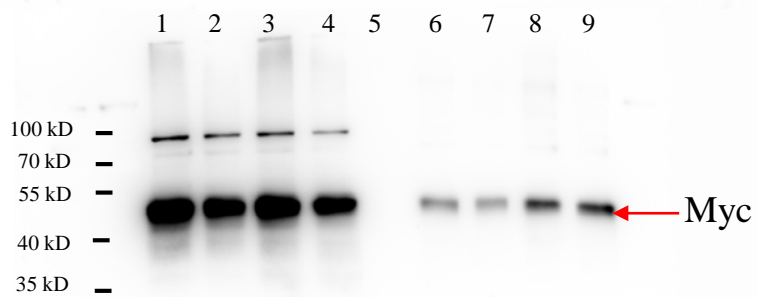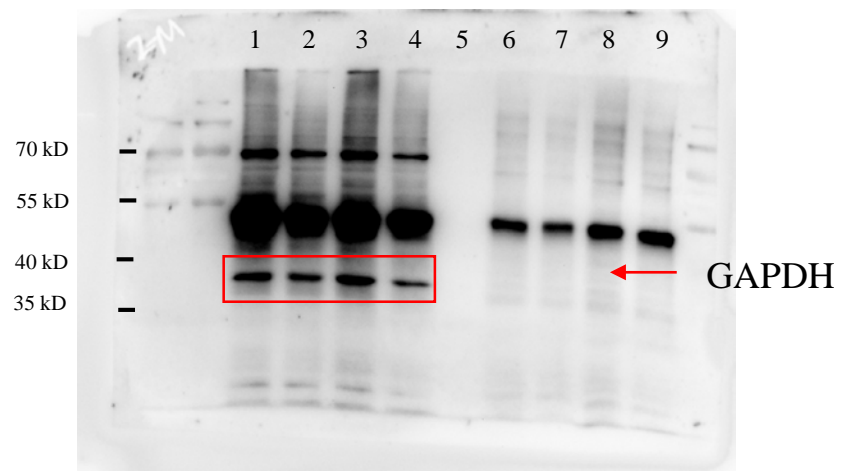

Supplement: fig4-data9 [file elife-98181-fig4-data9-v1.pdf]
