# Supplementary material for: Upregulated expression of ubiquitin ligase TRIM21 promotes PKM2 nuclear translocation and astrocyte activation in experimental autoimmune encephalomyelitis
Source: eLife journal article supplement (doi:10.7554/elife.98181), 2024-06-14

Cyto Myc-EV  
Cyto Myc-TRIM21  
Cyto Myc-TRIM21+DASA-58  
Nuc Myc-EV  
Nuc Myc-TRIM21  
Nuc Myc-TRIM21+DASA-58

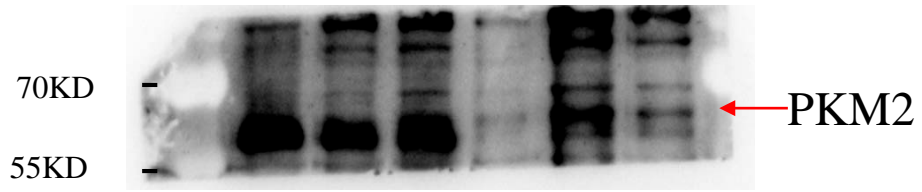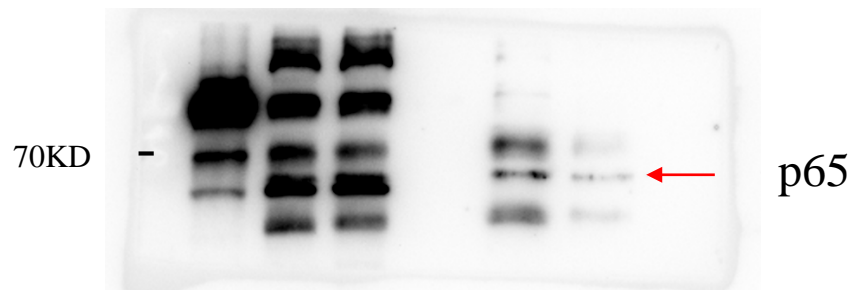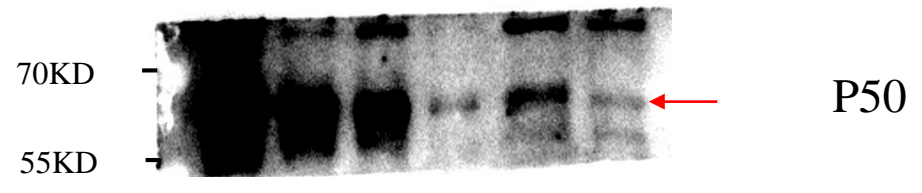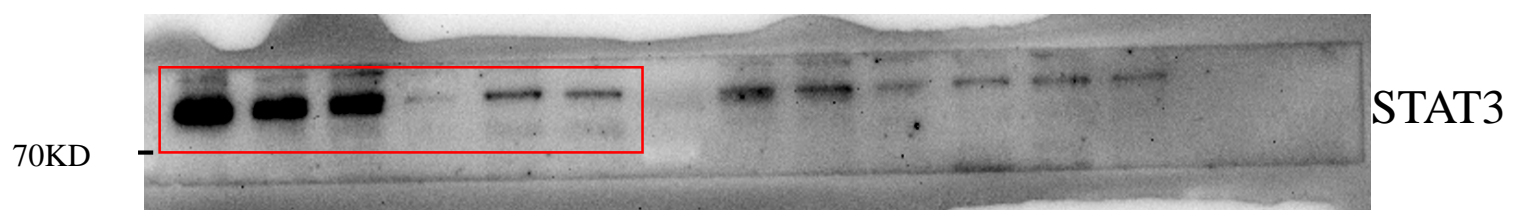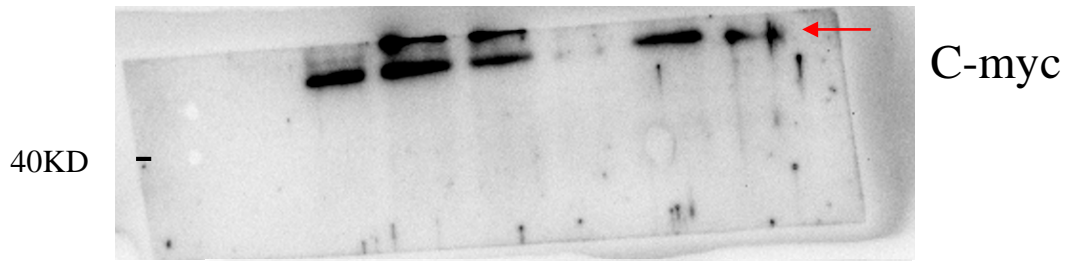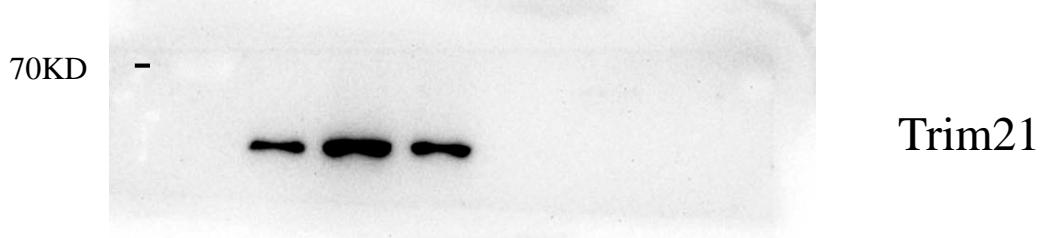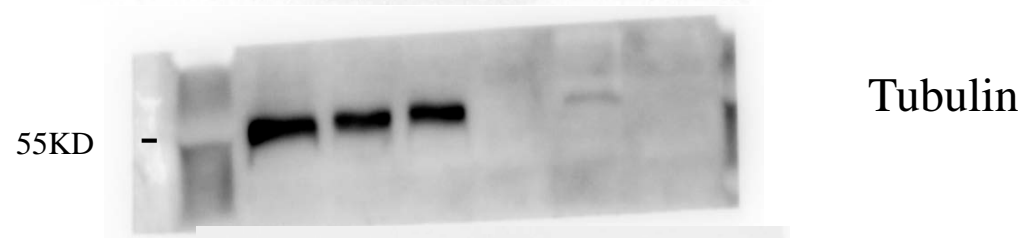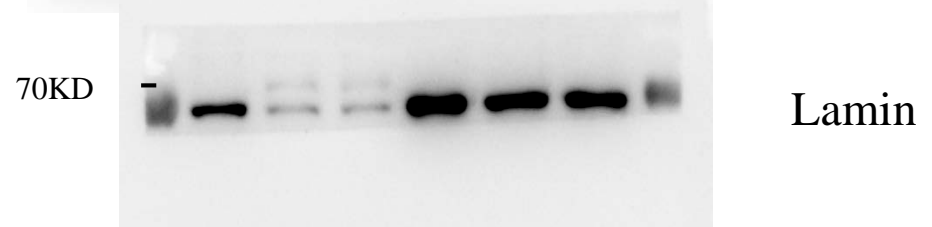

Supplement: fig6-data12 [file elife-98181-fig6-data12-v1.pdf]
