# Supplementary material for: Upregulated expression of ubiquitin ligase TRIM21 promotes PKM2 nuclear translocation and astrocyte activation in experimental autoimmune encephalomyelitis
Source: eLife journal article supplement (doi:10.7554/elife.98181), 2024-06-14

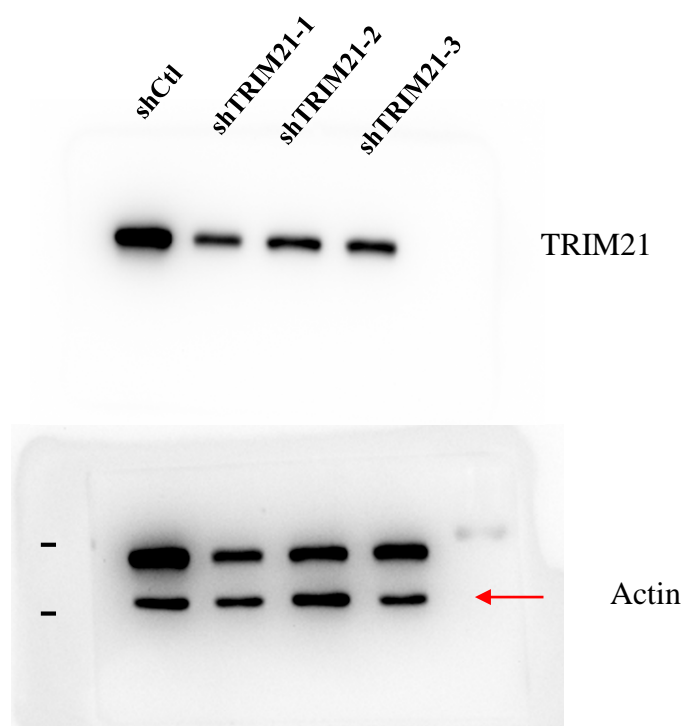

Supplement: fig6-figsupp1-data3 [file elife-98181-fig6-figsupp1-data3-v1.pdf]
