# Supplementary material for: Upregulated expression of ubiquitin ligase TRIM21 promotes PKM2 nuclear translocation and astrocyte activation in experimental autoimmune encephalomyelitis
Source: eLife. 2024 Sep 12;13:RP98181. doi: 10.7554/eLife.98181 (PMC11392529; doi:10.7554/eLife.98181)
Supplement: Figure 1—figure supplement 1—source data 1. [file elife-98181-fig1-figsupp1-data1.xlsx]

## Sheet: Figure 1-figure supplement 1A
		nuclear PKM2
	naïve	onset	peak	chronic
	2.03	26.72	16.59	7.69
	4.84	14.64	12.51	20.24
	6.15	15.29	17.81
	9.45		15.99

## Sheet: Figure 1-figure supplement 1B 
			PKM2 MFI
		naïve	onset	peak	chronic
		22.47	52.34	55.32	42.94
		19.35	38.87	55.36	51.43
		19.36	50.86	51.43
		19.77		48.96
