# Supplementary material for: Upregulated expression of ubiquitin ligase TRIM21 promotes PKM2 nuclear translocation and astrocyte activation in experimental autoimmune encephalomyelitis
Source: eLife. 2024 Sep 12;13:RP98181. doi: 10.7554/eLife.98181 (PMC11392529; doi:10.7554/eLife.98181)
Supplement: Figure 1—source data 1. [file elife-98181-fig1-data1.xlsx]

## Sheet: Fig 1C
	Control	MOGsup 6h	MOGsup 12h	MOGsup 24h
	22.855	36.529	48.068	38.552
	18.97	43.809	46.013	37.89
	20.528	46.079	45.636	33.832
	16.948	45.6	48.706	44.338
	11.8	47.957	43.84	45.315

## Sheet: Fig 1D
	Control	MOGsup 6h	MOGsup 12h	MOGsup 24h
	55.7143	97.1429	98.6667	98.1818
	8.88889	97.0588	98.5075	100
	56.7164	98.3871	100	100
	28	100	100	98.8235
	19.697	100	100	97.5
