# Supplementary material for: Upregulated expression of ubiquitin ligase TRIM21 promotes PKM2 nuclear translocation and astrocyte activation in experimental autoimmune encephalomyelitis
Source: eLife. 2024 Sep 12;13:RP98181. doi: 10.7554/eLife.98181 (PMC11392529; doi:10.7554/eLife.98181)
Supplement: Figure 2—figure supplement 1—source data 1. [file elife-98181-fig2-figsupp1-data1.xlsx]

## Sheet: Figure 2-figure supplement 1
		PKM2 level/Actin
	Control	DASA-58	MOGsup	MOGsup+DASA-58
	1	1.25058	1.1047	1.00212
	1	0.875076	1.09266	1.12684
	1	0.701016	0.721142	0.741996
