# Supplementary material for: Upregulated expression of ubiquitin ligase TRIM21 promotes PKM2 nuclear translocation and astrocyte activation in experimental autoimmune encephalomyelitis
Source: eLife. 2024 Sep 12;13:RP98181. doi: 10.7554/eLife.98181 (PMC11392529; doi:10.7554/eLife.98181)
Supplement: Figure 2—figure supplement 2—source data 1. [file elife-98181-fig2-figsupp2-data1.xlsx]

## Sheet: Figure 2-figure supplement 2
		IL-6					TNF-α					iNOS
	Control	DASA-58	MOGsup	MOGsup+DASA-58		Control	DASA-58	MOGsup	MOGsup+DASA-58		Control	DASA-58	MOGsup	MOGsup+DASA-58
	1	0.747994	1.92071	1.73209		0.986752	0.309411	1.57922	1.04086		0.533391	0.768179	46.3813	17.386
	1	0.779853	1.88121	1.66028		1.01325	0.261552	1.74571	0.946034		1.46661	0.940842	50.217	23.1773
	1	0.689013	1.87142	1.72084							1			2.32002
	1.26596		6.60333	0.310542
	0.986623		2.98957	0.165104
	0.747421	0.645245	0.660455	1.16303
	1.57511	1.28688	7.47679	1.10721
	0.42489	2.28294	2.27088	2.31472
