# Supplementary material for: Upregulated expression of ubiquitin ligase TRIM21 promotes PKM2 nuclear translocation and astrocyte activation in experimental autoimmune encephalomyelitis
Source: eLife. 2024 Sep 12;13:RP98181. doi: 10.7554/eLife.98181 (PMC11392529; doi:10.7554/eLife.98181)
Supplement: Figure 2—source data 1. [file elife-98181-fig2-data1.xlsx]

## Sheet: Fig 2B
	Control	DASA-58	MOGsup	MOGsup+DASA-58
	22.73	28.57	65.63	23.4
	26.47	12.9	66.67	21.05
	25.81	22.58	65.52	9.76
	27.27	14.29	64.1	27.78
	22.45	21.54	62.5	27.78

## Sheet: Fig 2C
		Glucose consumption						Lactate production
	Control	DASA-58	MOGsup	MOGsup+DASA-58			Control	DASA-58	MOGsup	MOGsup+DASA-58
	0.597292	0.454105	0.989009	0.377398			1.95301	1.81386	3.45831	2.97762
	0.650475	0.491948	0.61161	0.58195			1.73796	1.63677	3.24959	2.38942
	0.610588	0.454105	0.95219	0.349784			2.46532	2.01625	3.35711	3.15472
	0.628997	0.460242	0.646384	0.553313			1.95933	1.82019	3.47096	2.9966
							1.73164	1.64309	3.24959	2.40207
							2.45267	2.00993	3.35711	3.14207

## Sheet: Fig 2D
	Control	DASA-58	MOGsup	MOGsup+DASA-58
	1	0.333881	2.21741	0.717202
	1	0.72814	2.39884	1.09901
	1	1.59783	3.33794	2.51667

## Sheet: Fig 2E
			0 h					24 h					48 h					72 h
	Control	DASA-58	MOGsup	MOGsup+DASA-58		Control	DASA-58	MOGsup	MOGsup+DASA-58		Control	DASA-58	MOGsup	MOGsup+DASA-58		Control	DASA-58	MOGsup	MOGsup+DASA-58
	0.5991	0.6396	0.6126	0.619		1.0646	1.026	0.8789	0.8848		1.1156	1.1781	0.8216	0.73		1.2461	1.1378	1.1214	1.0612
	0.6459	0.6975	0.6147	0.5925		1.1558	1.3062	1.0753	0.799		1.1018	1.2487	1.1701	0.83		1.2175	1.1839	1.1328	1.0715
	0.579	0.6193	0.59	0.5938		1.0868	1.2554	1.1321	0.9502		1.2983	1.387	0.7949	1.0174		1.2039	1.203	1.0938	1.0234
	0.57	0.5673	0.5744	0.5673		1.1013	1.2668	1.0617	0.8413		1.2911	1.5011	1.2821	0.9877		1.2137	1.1572	1.1981	1.0432
	0.5818	0.5814	0.576	0.5822		0.8946	1.0758	1.0659	1.0065		1.232	1.0027	0.7951	0.9236		1.1078	1.1648	1.146	1.2189

## Sheet: Fig 2G
	Control	DASA-58	MOGsup	MOGsup+DASA-58
	16.4481	19.3939	21.6849	21.8978
	16.8975	23.0284	20.7237	21.2903
	22.7969	14.4	23.4007	23.1281
	21.4286	23.9216	25.4799	17.5159
	15.122	16.1654	19.2568	16.436
	22.5877	20.0535	34.9882	18.0352
	19.8853	18.9448	31.3346	17.7198
	19.7869	20.1342	31.5412	11.9537
	21.9215	17.6895	22.6263	15.7047
	17.5792	21.8456	25.355	14.1791
