# Supplementary material for: Upregulated expression of ubiquitin ligase TRIM21 promotes PKM2 nuclear translocation and astrocyte activation in experimental autoimmune encephalomyelitis
Source: eLife. 2024 Sep 12;13:RP98181. doi: 10.7554/eLife.98181 (PMC11392529; doi:10.7554/eLife.98181)
Supplement: Figure 3—figure supplement 1—source data 1. [file elife-98181-fig3-figsupp1-data1.xlsx]

## Sheet: Figure 3-figure supplement 1A
		GFAP MFI
	Control	DASA-58	MOGsup	MOGsup+DASA-58
	13.19	12.199	15.004	12.59
	12.729	11.955	14.919	12.545
	12.667	11.961	14.091	13.778
	13.156	11.905	13.484	13.021
	13.389	12.176	13.225	11.663
	13.835	11.609	13.576	12.352
	12.954	12.452	14.169	12.5
	12.664	11.621	13.521	12.958

## Sheet: Figure 3-figure supplement 1B
		Relative nuclear PKM2/lamin					Relative nuclear STAT3/lamin					Relative nuclear p65/lamin					Relative nuclear p50/lamin
	Control	DASA-58	MOGsup	MOGsup+DASA-58		Control	DASA-58	MOGsup	MOGsup+DASA-58		Control	DASA-58	MOGsup	MOGsup+DASA-58		Control	DASA-58	MOGsup	MOGsup+DASA-58
	1	1.23203	2.71016	2.36683		1	0.497524	1.45486	1.07767		1	1.09113	2.28803	1.22625		1	0.724235	2.12201	1.37985
	1	0.632073	1.73205	1.58579		1	1.79775	1.54497	0.531551		1	1.48349	1.08197	0.655143		1	1.5092	7.13086	3.91094
	1	0.224148	1.17475	1.01898		1	2.31501	1.50394	0.790372		1	1.48463	0.938123	0.956886		1	0.337442	3.62773	2.38503
	1	1.21401	1.12348	0.656164		1	2.31289	1.48886	0.853892
	1	1.27906	1.2037	0.594246
	1	1.29208	1.14679	0.640318

## Sheet: Figure 3-figure supplement 1C
		Relative cytoplasmic PKM2/lamin					Relative cytoplasmic STAT3/lamin					Relative cytoplasmic p65/lamin					Relative cytoplasmic p50/lamin
	Control	DASA-58	MOGsup	MOGsup+DASA-58		Control	DASA-58	MOGsup	MOGsup+DASA-58		Control	DASA-58	MOGsup	MOGsup+DASA-58		Control	DASA-58	MOGsup	MOGsup+DASA-58
	1	1.14126	1.1451	1.29953		1	0.714824	0.8652	0.533111		1	1.08037	0.845981	0.914167		1	1.15523	1.43	1.02894
	1	1.65195	2.58165	3.81658		1	2.68788	1.39265	1.44081		1	1.20812	0.964673	0.976051		1	1.2409	2.07982	2.76503
	1	0.969726	1.1468	1.35919		1	0.961101	1.08265	1.07927		1	0.841271	0.922383	1.1994		1	1.88741	1.54048	1.6689
	1	1.48086	1.29705	1.07847		1	1.32305	1.11013	1.17015
	1	0.964161	0.841144	1.13058
	1	1.21671	1.42689	1.62486
