# Supplementary material for: Upregulated expression of ubiquitin ligase TRIM21 promotes PKM2 nuclear translocation and astrocyte activation in experimental autoimmune encephalomyelitis
Source: eLife. 2024 Sep 12;13:RP98181. doi: 10.7554/eLife.98181 (PMC11392529; doi:10.7554/eLife.98181)
Supplement: Figure 3—source data 1. [file elife-98181-fig3-data1.xlsx]

## Sheet: Fig 3A
	Control	DASA-58	MOGsup	MOGsup+DASA-58
	10.939	10.952	15.866	12.867
	10.432	10.774	13.068	11.169
	10.601	10.816	15.168	11.274
	10.729	10.757	15.405	13.485
	12.74	10.902	15.396	13.525
	12.715	10.951	15.502	11.246
	10.144	10.588	14.884	12.912
	10.097	10.686	13.009	12.974

## Sheet: Fig 3B
	Control	DASA-58	MOGsup	MOGsup+DASA-58
	28.426	30.746	33.824	30.816
	30.262	25.282	36.451	31.454
	26.925	30.953	37.581	28.748
	26.46	23.65	32.86	26.336
	32.256	21.567	30.252	26.336
	32.347	22.588	29.905	27.014
	28.277	25.123	35.556	21.552
	27.128	26.921	37.464	20.632
	23.373	31.738	47.788	32.394
	26.101	27.048	44.774	26.431
