# Supplementary material for: Upregulated expression of ubiquitin ligase TRIM21 promotes PKM2 nuclear translocation and astrocyte activation in experimental autoimmune encephalomyelitis
Source: eLife. 2024 Sep 12;13:RP98181. doi: 10.7554/eLife.98181 (PMC11392529; doi:10.7554/eLife.98181)
Supplement: Figure 5—source data 1. [file elife-98181-fig5-data1.xlsx]

## Sheet: Fig 5E
	naïve	onset	peak	chronic
	8.2914	11.7794	9.8678	10.2804
	6.34234	11.0091	12.1168	7.51318
	8.19825	12.5287	11.0356	11.5673
			11.4637	10.8639
			11.8233	12.3014
			11.675	8.84521

## Sheet: Fig 5F
	Control	MOGsup 3h	MOGsup 6h		Control	MOGsup 12h		Control	MOGsup 24h
	1.18823	21.3053	10.5204		1.00218	5.21124		0.917668	5.72118
	0.811769	18.5242	11.2873		0.997818	4.64782		1.08233	7.06944

## Sheet: Fig 5G
	Control	MOGsup
	1	1.70255
	1	1.69576
	1	1.55152
	1	1.28711

## Sheet: Fig 5H
	Control	EAE
	15.2844	30.0002
	13.455	42.1538
	30.2935	35.4096
	29.0775	37.347
	22.2472	29.5528
