# Supplementary material for: Upregulated expression of ubiquitin ligase TRIM21 promotes PKM2 nuclear translocation and astrocyte activation in experimental autoimmune encephalomyelitis
Source: eLife. 2024 Sep 12;13:RP98181. doi: 10.7554/eLife.98181 (PMC11392529; doi:10.7554/eLife.98181)
Supplement: Figure 6—source data 1. [file elife-98181-fig6-data1.xlsx]

## Sheet: Fig 6A
	EV	TRIM21-OE
	1	1.86785
	1	1.46814
	1	2.41406

## Sheet: Fig 6B
	shControl	shTRIM21-1	shTRIM21-2
	1	0.320933	0.085852
	1	0.63309	0.430759
	1	0.335847	0.519215
	1	0.580853	0.355965

## Sheet: Fig 6G
	Myc-EV	Myc-TRIM21	Myc-TRIM21+DASA-58
	38.78	39.8946	28.5217
	31.3853	40.2622	28.3048
	36.0845	37.6432	35.0731
	35.1039	35.3204	30.1028
	34.2105	37.8788	36.7347
	29.6758	34.2237	35.5482
	30.3241	40	36.1809
	33.9093	33.8308	29.5638
	32.9653	40.2913	30.2804
	20.221	39.8425	23.2759

## Sheet: Fig 6H
		Lactate production				Glucose consumption
	Myc-EV	Myc-TRIM21	Myc-TRIM21+DASA-58		Myc-EV	Myc-TRIM21	Myc-TRIM21+DASA-58
	5.27985	6.34242	5.14703		1.14471	1.68799	0.873075
	4.41335	6.2602	5.05216		1.2379	2.68928	1.45204
	5.11541	6.15267	5.98823		0.912731	1.77721	1.48773
	4.92566	6.33609	5.64036		1.4679	1.62256	1.5492
	5.09643	6.72191	5.35575
	5.12806	6.33609	5.76686
