# Supplementary material for: Upregulated expression of ubiquitin ligase TRIM21 promotes PKM2 nuclear translocation and astrocyte activation in experimental autoimmune encephalomyelitis
Source: eLife. 2024 Sep 12;13:RP98181. doi: 10.7554/eLife.98181 (PMC11392529; doi:10.7554/eLife.98181)
Supplement: Figure 7—figure supplement 2—source data 1. [file elife-98181-fig7-figsupp2-data1.xlsx]

## Sheet: Figure 7-figure supplement 2A
			Control							TEPP-46
	Mouse 1	Mouse 2	Mouse 3	Mouse 4	Mouse 5	Mouse 6		Mouse1	Mouse2	Mouse3	Mouse4	Mouse5	Mouse6	Mouse7	Mouse8
Day1	0	0	0	0	0	0		0	0	0	0	0	0	0	0
Day2	0	0	0	0	0	0		0	0	0	0	0	0	0	0
Day3	0	0	0	0	0	0		0	0	0	0	0	0	0	0
Day4	0	0	0	0	0	0		0	0	0	0	0	0	0	0
Day5	0	0	0	0	0	0		0	0	0	0	0	0	0	0
Day6	0	0	0	0	0	0		0	0	0	0	0	0	0	0
Day7	0	0	0	0	0	0		0	0	0	0	0	0	0	0
Day8	0	0	0	0	0	0		0	0	0	0	0	0	0	0
Day9	0	0	0	0	0	0		0	0	0	0	0	0	0	0
Day10	0	0	0	0	0	0		0	0	0	0	0	0	0	0
Day11	0	0	0	0	0	0		0	0	0	0	0	0	0	0
Day12	0	0	0	0	0	0		0	0	0	0	0	0	0	0
Day13	0	0	0	0	0.5	0		0	0.5	0	0	0	0	0	0
Day14	0	0	0	0	1	0		0	0.5	0	0	0	0	0	0
Day15	0	0	0	0.5	1.5	0		0	1	0	0	0	0	0	0
Day16	0	0.5	0.5	0.5	2	0		0	1	0	0.5	0.5	0	0	0
Day17	0	0.5	1	0.5	2	0		0	1	0	0.5	1	0	0	0
Day18	0.5	0.5	1.5	0.5	2	0		0	1	0	1	1	0	0	0
Day19	0.5	0.5	3	1	1.5	0		0	1	0	1	1.5	0	0	0
Day20	0.5	0.5	3	1.5	1.5	0		0	1	0	1	3	0	0	0
Day21	0.5	0.5	3	2	1.5	0		0	1	0	1	3	0	0	0

## Sheet: Figure 7-figure supplement 2C
	Inflammation score				Demyelination score
	Ctrl	TEPP-46			Ctrl	TEPP-46
	3	0			3	0
	2	1			2	1
	2	1			2	1
		1				1

## Sheet: Figure 7-figure supplement 2E
	GFAP			IBA1			MBP
	Ctrl	TEPP-46		Ctrl	TEPP-46		Ctrl	TEPP-46
	633.073	407.522		255.76	504.793		14.168	35.59
	722.344	359.916		902.777	229.199		18.946	28.722
	376.957	278.696		717.854	142.192		24.124	31.72
	489.177	332.732		696.844	172.687		18.76	34.35
	513.168	306.123			139.895		18.292	35.678
	632.572	399.579			95.5928		18.394	29.11
		535.666						28.188
		466.003						31.236
