# Supplementary material for: Upregulated expression of ubiquitin ligase TRIM21 promotes PKM2 nuclear translocation and astrocyte activation in experimental autoimmune encephalomyelitis
Source: eLife. 2024 Sep 12;13:RP98181. doi: 10.7554/eLife.98181 (PMC11392529; doi:10.7554/eLife.98181)
Supplement: Figure 7—source data 1. [file elife-98181-fig7-data1.xlsx]

## Sheet: Fig 7A
			shVec							shTRIM21
	Mouse 1	Mouse 2	Mouse 3	Mouse 4	Mouse 5	Mouse 6		Mouse 1	Mouse 2	Mouse 3	Mouse 4	Mouse 5
Day1	0	0	0	0	0	0		0	0	0	0	0
Day2	0	0	0	0	0	0		0	0	0	0	0
Day3	0	0	0	0	0	0		0	0	0	0	0
Day4	0	0	0	0	0	0		0	0	0	0	0
Day5	0	0	0	0	0	0		0	0	0	0	0
Day6	0	0	0	0	0	0		0	0	0	0	0
Day7	0	0	0	0	0	0		0	0	0	0	0
Day8	0	0	0	0	0	0		0	0	0	0	0
Day9	0	0	0	0	0	0		0	0	0	0	0
Day10	0	0	0	0	0	0		0	0	0	0	0
Day11	0	0	0	0	0	0		0	0	0	0	0
Day12	0	0	0	0	0	0		0	0	0	0	0
Day13	0	0	0	0	0	0		0	0	0	0	0
Day14	0	0	0	0	0	0		0	0	0	0	0
Day15	0.5	0.5	1	0	0.5	0.5		0.5	0.5	0.5	0.5	0.5
Day16	1.5	0.5	2	0.5	0.5	0.5		0.5	0.5	0.5	0.5	0.5
Day17	2	0.5	2	0.5	0.5	0.5		0.5	0.5	0.5	0.5	1
Day18	3	0.5	2.5	0.5	0.5	0.5		1	1	0.5	0.5	1
Day19	3	0.5	3	0.5	0.5	0.5		1	1	0.5	0.5	1
Day20	4	1	3	0.5	0.5	0.5		1.5	1	0.5	0.5	1
Day21	4	1.5	3	0.5	0.5	0.5		1.5	0.5	0.5	0.5	1
Day22	4	1.5	3	0.5	0.5	0.5		1.5	0.5	0.5	0.5	1

## Sheet: Fig 7C
	Inflammation score				Demyelination score
	ShVec	shTRIM21			ShVec	shTRIM21
	2	0			2	1
	2	1			3	0
	3	1			3	0

## Sheet: Fig 7E
	ShVec	shTRIM21
	15.3075	47.92
	14.5075	51.495
	20.675	39.7275
	29.4775	35.6175
	21.12	38.0425
	39.3325

## Sheet: Fig 7F
	White matter			Gray matter
	ShVec	shTRIM21		ShVec	shTRIM21
	515.808	296.345		479.636	183.686
	513.195	247.225		271.342	80.7136
	705.691	264.07		320.697	158.312
	483.829	418.634		239.263	109.035
	391.739	313.869		228.449	274.128
	509.001			249.855

## Sheet: Fig 7G
	White matter			Gray matter
	ShVec	shTRIM21		ShVec	shTRIM21
	784.17	165.043		739	180
	709.857	248.494		743	192
	717.915	178.794		796	156
	135.594	174.432
	229.369	82.8117
	135.594	174.432
